# Supplementary material for: The ‘Saw but Forgot’ error: A role for short-term memory failures in understanding junction crashes?
Source: PLOS journal article supplement (doi:10.1371/journal.pone.0222905), 2019-09-23
Supplement: S3 (10.1371/journal.pone.0222905.s003) [file journal.pone.0222905.s003]

| <b>Measure</b>                    | <b>Approaching Vehicles</b> | <b>Mean</b> | <b><i>SE</i></b> |
|-----------------------------------|-----------------------------|-------------|------------------|
| <b>Behavioural Measures</b>       |                             |             |                  |
| Thresholds (m)                    | Car                         | 84.11       | 2.63             |
|                                   | Motorcycle                  | 85.74       | 2.42             |
| Estimation of Locations (degrees) | Car                         | 21.08*      | 2.05             |
|                                   | Motorcycle                  | 16.52*      | 2.10             |
| <b>Eye Tracking Measures</b>      |                             |             |                  |
| Proportion of Fixations           | Unreported Motorcycle       | .25         | .13              |
|                                   | Reported Motorcycle         | .45         | .17              |
| Proportion of Gaze                | Unreported Motorcycle       | .46         | .15              |
|                                   | Reported Motorcycle         | .70         | .16              |
| Mean Fixation Duration (ms)       | Unreported Motorcycle       | 63.76       | 43.12            |
|                                   | Reported Motorcycle         | 228.57      | 87.57            |
